# Supplementary material for: Subtyping Options for Microsporum canis Using Microsatellites and MLST: A Case Study from Southern Italy
Source: MDPI journal article supplement (doi:10.3390/pathogens11010004), 2021-12-22
Supplement: s1 [file s1]

**Table S3.** Indexes of genetic diversity and cluster rarity calculated for two populations from *Microsporium canis*.

| Cluster   | Number of samples | Number of genotypes | D     | DW index | I <sub>A</sub> (p value) | I <sub>A</sub> (p value) |
|-----------|-------------------|---------------------|-------|----------|--------------------------|--------------------------|
| Cluster 1 | 37                | 11                  | 0.071 | 0.24     | 1.38 (<0.01)             | 1.38 (<0.01)             |
| Cluster 2 | 28                | 7                   | 0.116 | 0.26     | 1 (<0.01)                | 1 (<0.01)                |

D, Nei's gene diversity; I<sub>A</sub>, index of association
