# Supplementary material for: Subtyping Options for Microsporum canis Using Microsatellites and MLST: A Case Study from Southern Italy
Source: MDPI journal article supplement (doi:10.3390/pathogens11010004), 2021-12-22
Supplement: s1 [file s1]

**Table S4.** Analysis of molecular variance design and results.

| Source of variation | Degree of freedom | Sum of squares | Variance of components | Percentage of variation |
|---------------------|-------------------|----------------|------------------------|-------------------------|
| Among clusters      | 1                 | 59.849         | 1.86380 Va             | 62.06                   |
| Within clusters     | 62                | 70.651         | 1.13953 Vb             | 37.94                   |
| Total               | 63                | 130.500        | 3.00333                |                         |
