# Supplementary material for: Subtyping Options for Microsporum canis Using Microsatellites and MLST: A Case Study from Southern Italy
Source: MDPI journal article supplement (doi:10.3390/pathogens11010004), 2021-12-22
Supplement: s1 [file s1]

**Table S2.** Distribution of hosts and animals with and without lesion between microsatellite clusters.

| Cluster   | Total | Animals with lesion | Animals without lesion | Dog | Cat | Human | Rabbit |
|-----------|-------|---------------------|------------------------|-----|-----|-------|--------|
| Cluster 1 | 37    | 25                  | 7                      | 5   | 25  | 5     | 2      |
| Cluster 2 | 28    | 21                  | 5                      | 8   | 15  | 2     | 3      |
| Total     | 65    | 46                  | 12                     | 13  | 40  | 7     | 5      |
