# Supplementary material for: Subtyping Options for Microsporum canis Using Microsatellites and MLST: A Case Study from Southern Italy
Source: MDPI journal article supplement (doi:10.3390/pathogens11010004), 2021-12-22
Supplement: s1 [file s1]

**Table S1.** Accession number for various genes of *Microsporium* strains generated in this study.

| Species               | Strain number <sup>a</sup> | European Nucleotide Archive (ENA) accession numbers for eight loci |                                |            |             |             |            |               |              |
|-----------------------|----------------------------|--------------------------------------------------------------------|--------------------------------|------------|-------------|-------------|------------|---------------|--------------|
|                       |                            | ITS                                                                | IGS                            | <i>act</i> | <i>mcm7</i> | <i>tubb</i> | <i>CaM</i> | <i>tefl-a</i> | <i>gapdh</i> |
| <i>M. canis</i>       | CD448                      | LR989561 (ITS-G1) <sup>b</sup>                                     | LR989270 (IGS-G1) <sup>b</sup> | OU374996   | OU375053    | OU375000    | OU375004   | OU375008      | OU375012     |
| <i>M. audouinii</i>   | CBS 404.61                 | OU375165                                                           | OU374853                       | OU374997   | OU375054    | OU375001    | OU375005   | OU375009      | OU375013     |
| <i>M. ferrugineum</i> | CBS 497.48                 | OU375166                                                           | OU374854                       | OU374998   | OU375055    | OU375002    | OU375006   | OU375010      | OU375014     |
|                       | SK 1775/19                 | OU375167                                                           | OU374855                       | OU374999   | OU375056    | OU375003    | OU375007   | OU375011      | OU375015     |

<sup>a</sup> CBS, Westerdijk Fungal Biodiversity Institute (formerly Centraalbureau voor Schimmelcultures), Utrecht, Netherlands; CD, Veterinary Mycology collection, Department of Veterinary Medicine, University of Bari, Italy; SK, personal number, strain not deposited in public culture collection; <sup>b</sup> ITS and IGS sequences of strain CD488 were identical to CD1134 for which GenBank accession numbers were generated previously and thus not deposited again.
