# Supplementary material for: Subtyping Options for Microsporum canis Using Microsatellites and MLST: A Case Study from Southern Italy
Source: MDPI journal article supplement (doi:10.3390/pathogens11010004), 2021-12-22
Supplement: s1 [file s1]

**Table S5.** List of loci screened for variability in the present study and corresponding primer pairs.

| Locus         | Primer         | Sequence (5'–3')           | Reference |
|---------------|----------------|----------------------------|-----------|
| <i>ITS</i>    | ITS1F          | CTTGGTCATTTAGAGGAAGTAA     | [38,39]   |
|               | NL4            | GGTCCGTGTTTCAAGACGG        |           |
| <i>IGS</i>    | LR12R          | GAACGCCTCTAAGTCAGAATCC     | [40]      |
|               | invSR1R        | ACTGGCAGAATCAACCAGGTA      |           |
| <i>tubb</i>   | Bt2a           | GGTAACCAAATCGGTGCTGCTTTC   | [41]      |
|               | Bt2b           | ACCCTCAGTGTAGTGACCCTTGGC   |           |
| <i>tef1-α</i> | EFdermF        | CACATTAACCTGGTCGTTATCG     | [42]      |
|               | EFdermR        | CATCCTTGGAGATACCAGC        |           |
| <i>CaM</i>    | CF1L (forward) | GCCGACTCTTTGACYGARGAR      | [43]      |
|               | CF1M (forward) | AGGCCGAYTCTYTGACYGA        |           |
|               | CF4 (reverse)  | TTTYTGCATCATRAGYTGGAC      |           |
| <i>act</i>    | ACT512F        | ATGTGCAAGGCCGGTTTCGC       | [44]      |
|               | ACT783R        | TACGAGTCCTTCTGGCCCAT       |           |
| <i>gapdh</i>  | GPD_F          | CAGGTTGTTGCTGTCAACGAC      | [45]      |
|               | GPD_R          | GATGTTCTGGGCAGCGGTAC       |           |
| <i>mcm7</i>   | Mcm7-709for    | ACIMGIGTITCVGAYGTHAARCC    | [46]      |
|               | Mcm7-1348rev   | GAYTTDGCACICCCIGGRTCWCCCAT |           |
